# Supplementary material for: The derived allele of a novel intergenic variant at chromosome 11 associates with lower body mass index and a favorable metabolic phenotype in Greenlanders
Source: PubMed Central journal article supplement (PMC7001991; doi:10.1371/journal.pgen.1008544), 2020-01-24

S1 Fig.

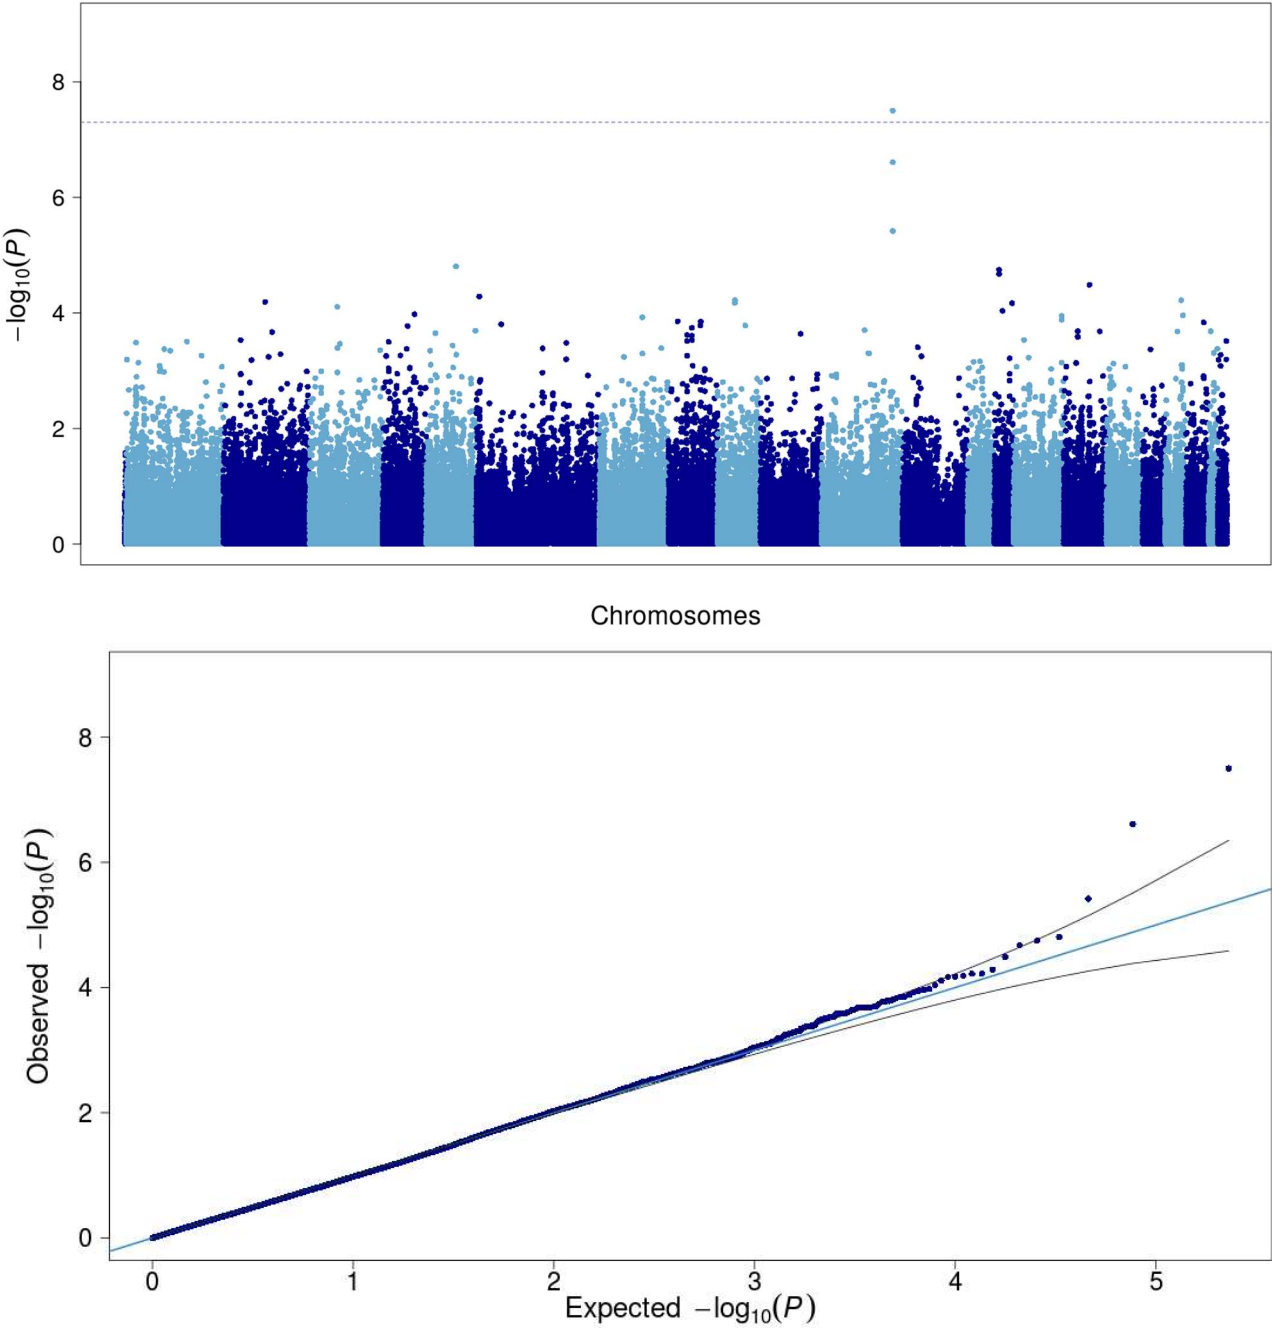

Supplement: pgen.1008544.s001.pdf [file pgen.1008544.s001.pdf]
